# Supplementary material for: Legume Consumption and Blood Pressure Control in Individuals with Type 2 Diabetes and Hypertension: Cross-Sectional Findings from the TOSCA.IT Study
Source: MDPI journal article supplement (doi:10.3390/nu15132895), 2023-06-26
Supplement: s1 [file s1]

**Table S1.** General characteristics of the study participants (*N* = 1897)

|                                 |              |
|---------------------------------|--------------|
| Men (%)                         | 1079 (56.9%) |
| Age (years)                     | 62.8±6.4     |
| Diabetes Duration (years)       | 8.7±5.7      |
| History of Hypertension (years) | 7.2±6.4      |
| BMI (Kg/m <sup>2</sup> )        | 30.8±4.5     |
| Waist circumference (cm)        | 105.6±11.1   |
| Systolic blood pressure (mmHg)  | 135.5±15.0   |
| Diastolic blood pressure (mmHg) | 80.1±8.8     |
| HbA1c (%)                       | 7.68±0.51    |
| Total cholesterol (mg/dL)       | 178.7±37.4   |
| LDL-cholesterol (mg/dL)         | 101.8±31.6   |
| Triglycerides (mg/dL)           | 153.5±75.2   |
| HDL-cholesterol (mg/dL)         | 45.8±11.7    |
| C-reactive protein (mg/dL)      | 0.42±1.94    |
| Current smokers (%)             | 302 (15.9%)  |

**Table S2.** General characteristics and metabolic profile of the study participants according to the sex-specific quartiles of legume intake (g/1000 kcal /day).

|                             | <b>Quartile 1<br/>(2.9±1.7)</b> | <b>Quartile 2<br/>(8.1±1.8)</b> | <b>Quartile 3<br/>(14.1±2.7)</b> | <b>Quartile 4<br/>(28.3±10.6)</b> | <b>P-value</b> |
|-----------------------------|---------------------------------|---------------------------------|----------------------------------|-----------------------------------|----------------|
| Age (years)                 | 63.0±6.4                        | 62.7±6.5                        | 62.9±6.4                         | 62.7±6.3                          | 0.899          |
| Diabetes Duration (years)   | 8.7±5.7                         | 8.4±5.8                         | 8.7±5.6                          | 9.0±5.6                           | 0.509          |
| BMI (Kg/m <sup>2</sup> )    | 30.7±4.3                        | 30.8±4.5                        | 30.9±4.6                         | 31.0±4.4                          | 0.836          |
| Waist circumference (cm)    | 106.0±11.4                      | 105.9±11.1                      | 105.2±11.3                       | 105.3±10.5                        | 0.534          |
| HbA1c (%)                   | 7.71±0.53                       | 7.64±0.50                       | 7.68±0.51                        | 7.68±0.50                         | 0.205          |
| Total cholesterol (mg/dL)   | 177.8±39.4                      | 180.6±36.6                      | 179.5±38.6                       | 177.1±35.0                        | 0.442          |
| LDL-cholesterol (mg/dL)     | 100.7±33.2                      | 102.4±30.5                      | 103.2±31.6                       | 100.8±31.3                        | 0.554          |
| Triglycerides (mg/dL)       | 156.7±78.9                      | 153.6±77.4                      | 151.1±73.4                       | 152.7±70.7                        | 0.713          |
| HDL-cholesterol (mg/dL)     | 45.4±11.5                       | 46.7±12.3                       | 45.3±11.4                        | 45.6±11.5                         | 0.214          |
| C-reactive protein (mg/dL)  | 0.47±2.66                       | 0.35±0.57                       | 0.44±2.57                        | 0.40±1.10                         | 0.803          |
| % on antihypertensive drugs | 448 (94.3)                      | 472 (95.9)                      | 442 (96.3)                       | 453 (96.2)                        | 0.404          |
| % with microalbuminuria     | 101 (21.3)                      | 106 (22.4)                      | 98 (20.7)                        | 102 (21.5)                        | 0.798          |

M±SD
